# Supplementary material for: Integrated Transcriptome and Biochemical Analysis Provides New Insights into the Leaf Color Change in Acer fabri
Source: MDPI journal article supplement (doi:10.3390/f14081638), 2023-08-14
Supplement: s1 [file s1]

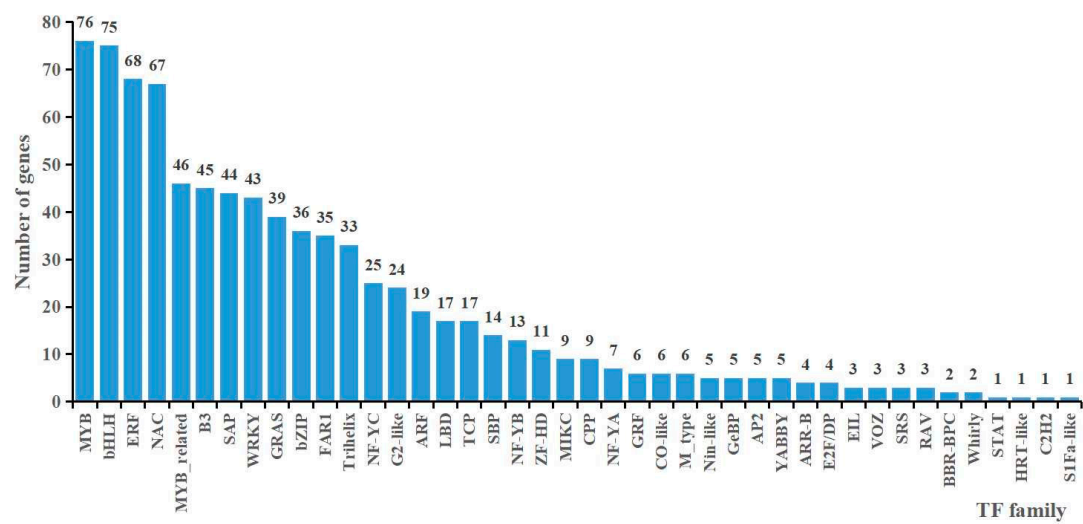

**Figure S1:** Gene number of each TF family.

**Table S1.** Primer sequences used for qRT-PCR.

| Number | Gene name        | Primer sequence                                      |
|--------|------------------|------------------------------------------------------|
| 1      | <i>Af0006119</i> | F:TCATAGCCGGAGTTCTTGCC<br>R:CCACAGTTCTGAGCATTTACGC   |
| 2      | <i>Af0006650</i> | F:TGGAAGGGTCCTAAAGTGGC<br>R:CGTCCTCCTCAAAGTGCTCAA    |
| 3      | <i>Af0005512</i> | F:TGGACGGGCTGGGTAAAGT<br>R:TCGCCATATTCGCTAGGGTT      |
| 4      | <i>Af0022301</i> | F:CTGTTCTTGTCTCGCAATCTC<br>R:CATGACTTCCATTTGCAGCCT   |
| 5      | <i>Af0023447</i> | F:CTCGTGAAGGAACCGAAAACTA<br>R:CTTTGGGACAACACTCAACACC |
| 6      | <i>Af0034384</i> | F:GAAGTTATTCGGCGTGCCA<br>R:TTTACCGCTTGAGGACCACC      |
| 7      | <i>Af0051627</i> | F:CTTTGCTTTTGGATTTCCTG<br>R:GACCGTCTCAAGTTTTCTGTGC   |
| 8      | <i>Af0052541</i> | F:GTGCGGTCTTACTCGTGAGCT<br>R:TCTTGGAGTCAGCAGCCATAAC  |
| 9      | <i>Af0033232</i> | F:TGATGTCTGGGATGGAGTTGG<br>R:CACGATGAAGAAGGCTGAGGA   |
| 10     | <i>Af0011479</i> | F:GCTGAGACACCCCAACATTTC<br>R:GCCAAACTCGACCATTAGGAA   |
| 11     | <i>Af0049421</i> | F:TTTACAAGGGAAGCCATAACCA<br>R:CGATGCCCCGATCAAAGTCA   |
| 12     | <i>Af0010511</i> | F:GATTCCAAGTGGCACGGTCT<br>R:ATCTGCGGCATTGCTTCC       |
| 13     | <i>AW0009192</i> | F:CACAGCAGTGCCCAAATCA<br>R:ACTTTGAACCTCCTCATCCACC    |
| 14     | <i>Af0011859</i> | F:TGGAGGAGACTATTGCGATGTG<br>R:CAGGCTTATTTCCAGCACCC   |

---

|    |                  |                                                  |
|----|------------------|--------------------------------------------------|
| 15 | <i>Af0021857</i> | F:CTTCGCTGGCACTATTTCGC<br>R:TGTGGAGGAGACACCCGTTT |
| 16 | <i>Af0015911</i> | F:TCGGTTCGATGCAGTTCCA<br>R:TTGTTGCGGAGGTTGTGGTA  |
| 17 | <i>TUB</i>       | F:CTCGCTAACCCGCCTAAACA<br>R:ATGTCAAGTCCAGCGTGTGT |

---

**Table S2.** Principal component analysis of the three developmental stages of *A. fabri* leaf color

| Comparable group | Var ID      | VIP      |
|------------------|-------------|----------|
| S1 versus S2     | Carotenoid  | 1.0028   |
|                  | Anthocyanin | 1.00151  |
|                  | Chlorophyll | 0.995674 |
| S2 versus S3     | Anthocyanin | 1.00992  |
|                  | Chlorophyll | 0.995736 |
|                  | Carotenoid  | 0.994274 |

S1: red leaf; S2: red and green leaf; S3: green leaf.

**Table S3.** The gene ID and descriptions of selected genes.

| Number | Gene ID   | Descriptions                                          |
|--------|-----------|-------------------------------------------------------|
| 1      | Af0034384 | TXG70870.1 hypothetical protein EZV62_005805 (HSFB2A) |
| 2      | Af0051627 | TXG68515.1 hypothetical protein EZV62_003450(NMT1)    |
| 3      | Af0052541 | GAY66185.1 hypothetical protein CUMW_246740(THY-1)    |
| 4      | Af0010511 | TXG71357.1 hypothetical protein EZV62_006292 (NAC100) |
| 5      | Af0033232 | TXG54913.1 hypothetical protein EZV62_020169(NAC83)   |
| 6      | Af0049421 | TXG69628.1 hypothetical protein EZV62_004563 (WRKY24) |
